# Supplementary material
Source: Royal Society of Chemistry journal article supplement (doi:10.1039/d5ta10392d)
Supplement: d5ta10392d1.pdf [file d5ta10392d1.pdf]

## Supporting Information

### **In-situ synthesized oxygen-vacancy-rich CuO nanosheet arrays for low-temperature ppb-level NO<sub>2</sub> sensing**

**Optimization of Hydrothermal Reaction Conditions for CuO Nanosheet Arrays:** The hydrothermal reaction temperature and duration were determined based on both literature reports<sup>1</sup> and preliminary experimental results. Previous studies have shown that relatively low hydrothermal temperatures tend to favor the growth of one-dimensional anisotropic CuO structures, whereas the higher temperature used in this work is more conducive to two-dimensional lateral growth. In the preliminary experiments, the CuO samples prepared at 90°C exhibited relatively low responses and poor selectivity toward NO<sub>2</sub> (Fig. S1). In contrast, the CuO nanosheets synthesized at 120°C for 12.5, 15, 17.5, and 19 h (Fig. S2) showed higher responses and better selectivity toward NO<sub>2</sub>. Therefore, 120°C was selected as the hydrothermal temperature for constructing CuO nanosheets in this study. The effects of reaction time (12.5, 15, 17.5, and 19 h) on the structure and gas-sensing performance were further investigated. A prolonged hydrothermal duration of 19 h led to increased nanosheet thickness and overgrowth of the nanosheets, resulting in a decline in the NO<sub>2</sub> sensing performance. Within the investigated parameter range, the samples prepared at 120°C for 12.5, 15, and 17.5 h exhibited better overall performance. Three independent batches of CuO samples were prepared under hydrothermal conditions at 120°C for 15 h, and the SEM (Fig. S3) results showed highly consistent and uniform nanosheet-array morphologies, confirming the good reproducibility of the synthesis process. The present synthesis was conducted on a laboratory small-batch scale, and further optimization of batch size, process reproducibility, and device-to-device consistency will be required for scalable production and practical application.

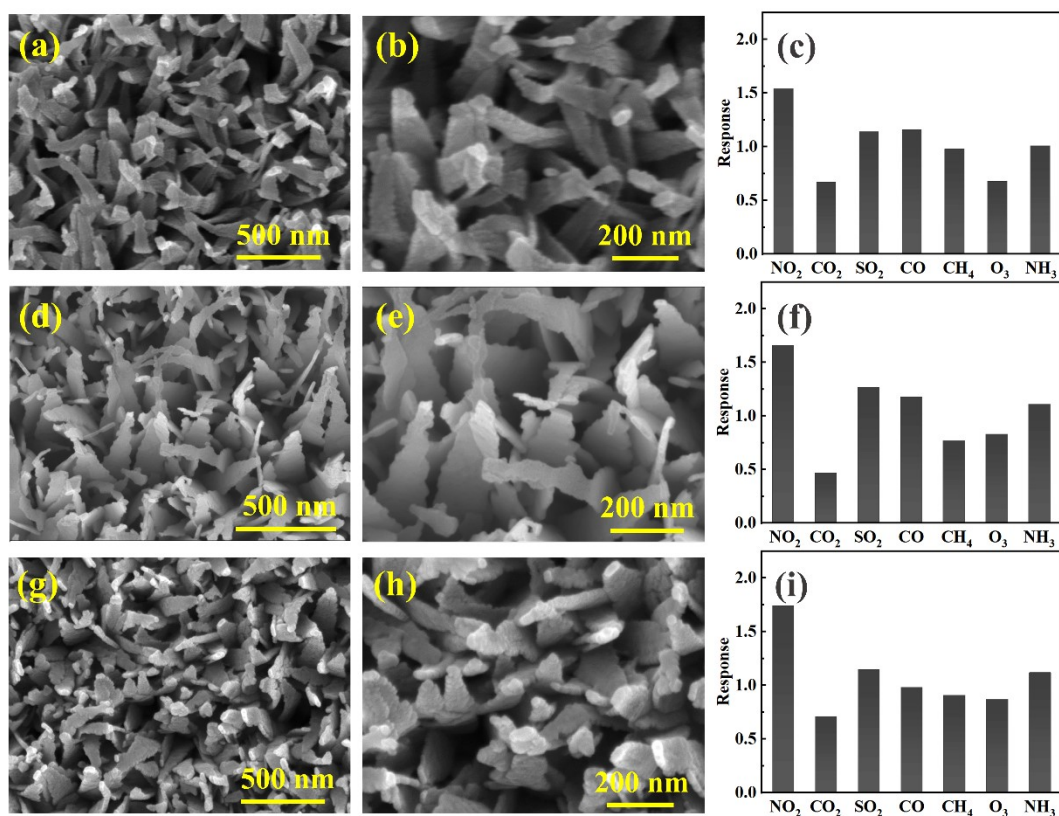

**Fig. S1** FESEM images of flakes CuO (a-b) CuO<sub>90°C-12.5 h</sub>, (d-e) CuO<sub>90°C-15 h</sub>, (g-h) CuO<sub>90°C-17.5 h</sub>. (c,f,i) Selectivity of CuO<sub>90°C-12.5 h</sub>, CuO<sub>90°C-15 h</sub>, and CuO<sub>90°C-17.5 h</sub> sensors to 100 ppb different interfering gases (carbon dioxide, sulfur dioxide, carbon monoxide, methane, ozone, ammonia).

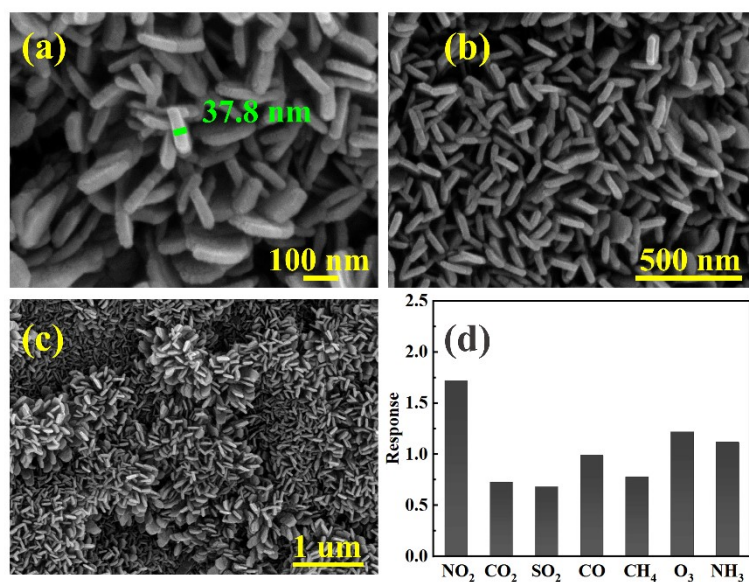

**Fig. S2** (a-c) FESEM images of flakes CuO<sub>120°C-19 h</sub>. (d) Selectivity of CuO<sub>120°C-19 h</sub> sensors to 100 ppb different interfering gases (carbon dioxide, sulfur dioxide, carbon monoxide, methane, ozone, ammonia).

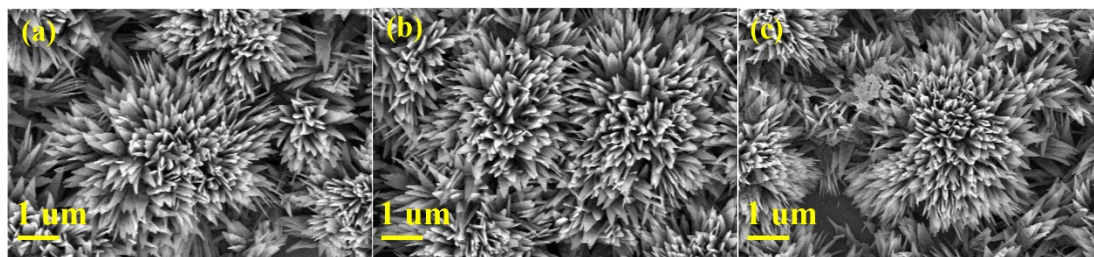

Fig. S3 SEM images of flakes (a)  $\text{CuO}_{120^\circ\text{C}-15\text{h}-1}$ . (b)  $\text{CuO}_{120^\circ\text{C}-15\text{h}-2}$ . (c)  $\text{CuO}_{120^\circ\text{C}-15\text{h}-3}$ .

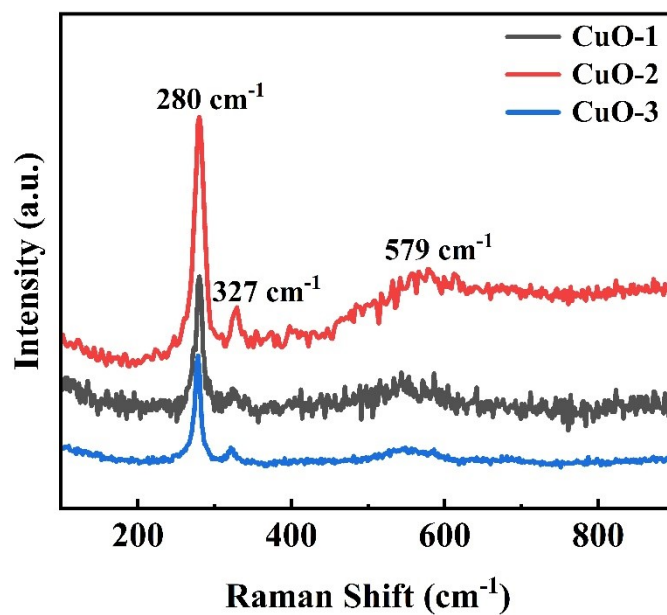

Fig. S4 Raman spectra of CuO-1, CuO-2, and CuO-3.

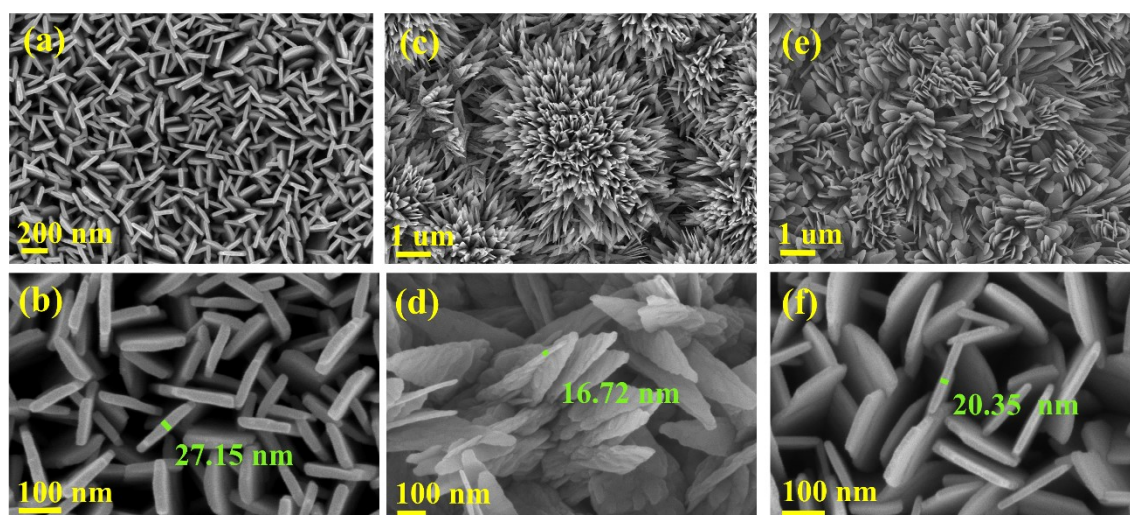

Fig. S5 FESEM images of flakes CuO (a-b) CuO-1. (c-d) CuO-2. (e-f) CuO-3.

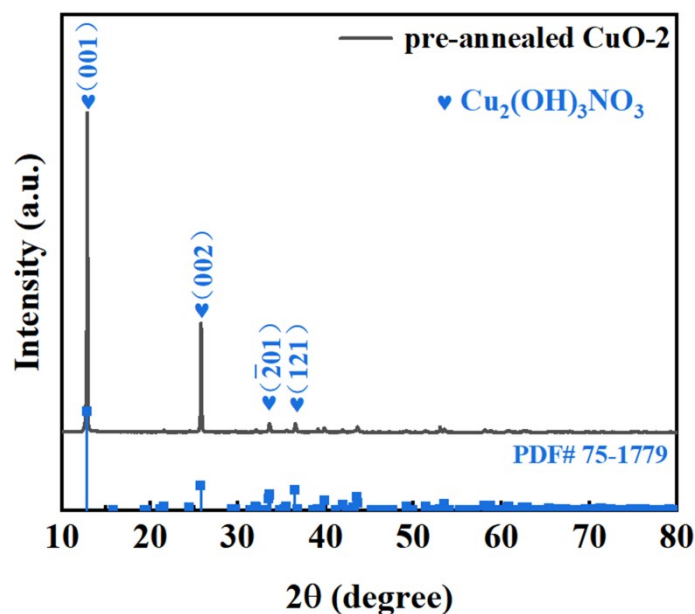

Fig. S6 The XRD pattern of pre-annealed CuO-2.

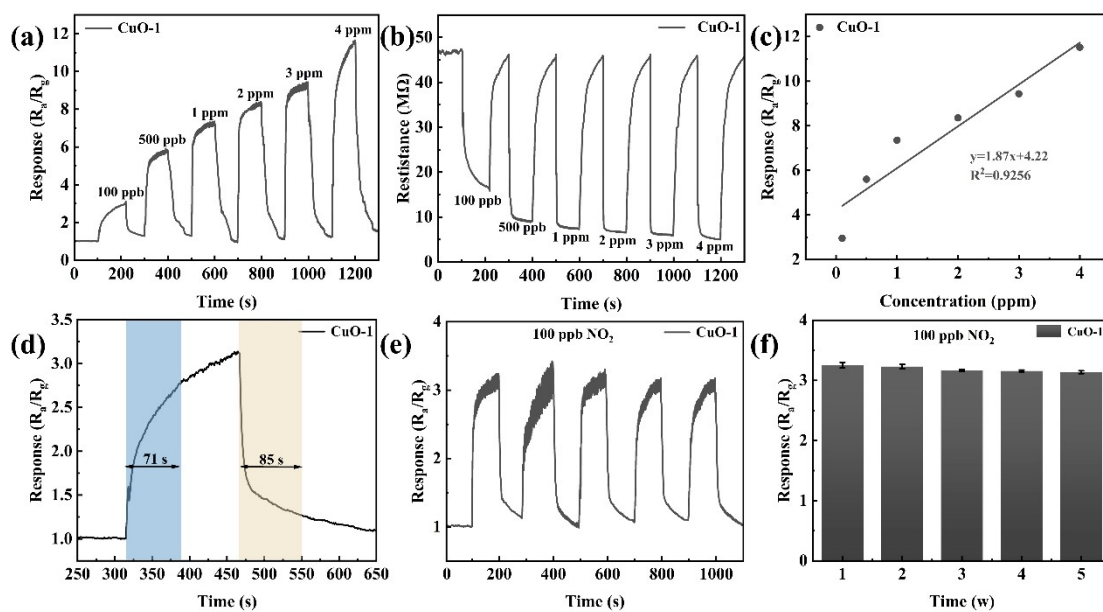

Fig. S7 (a) Dynamic response-recovery curves of the CuO-1 sensor toward  $\text{NO}_2$  concentrations ranging from 100 ppb to 4 ppm at  $75^\circ\text{C}$ . (b) Dynamic resistance curves of the CuO-1 sensor toward  $\text{NO}_2$  concentrations ranging from 100 ppb to 4 ppm at  $75^\circ\text{C}$ . (c) Linear fitting relationship between  $\text{NO}_2$  concentration and response values of the CuO-1 sensor at  $75^\circ\text{C}$ . (d) Instantaneous response-recovery curve of CuO-1. (e) Repeatability curve of five cycles of CuO-1. (f) Long-term stability with perfect curve of CuO-2 to 100 ppb  $\text{NO}_2$  at  $75^\circ\text{C}$ .

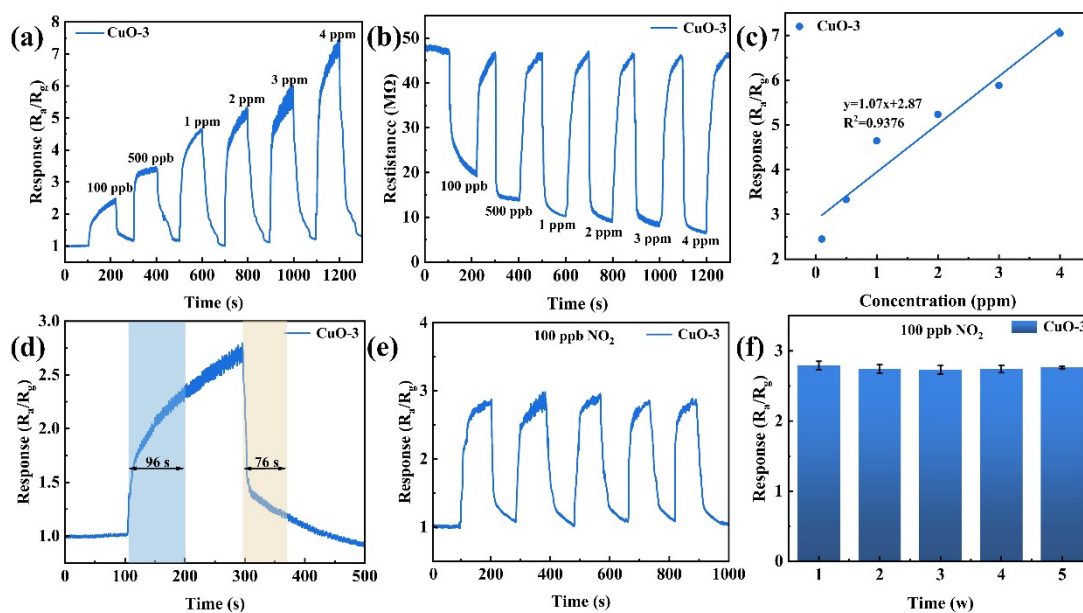

**Fig. S8** (a) Dynamic response-recovery curves of the CuO-3 sensor toward NO<sub>2</sub> concentrations ranging from 100 ppb to 4 ppm at 75°C. (b) Dynamic resistance curves of the CuO-3 sensor toward NO<sub>2</sub> concentrations ranging from 100 ppb to 4 ppm at 75°C. (c) Linear fitting relationship between NO<sub>2</sub> concentration and response values of the CuO-3 sensor at 75°C. (d) Instantaneous response-recovery curve of CuO-3. (e) Repeatability curve of five cycles of CuO-3. (f) Long-term stability with perfect curve of CuO-3 to 100 ppb NO<sub>2</sub> at 75°C.

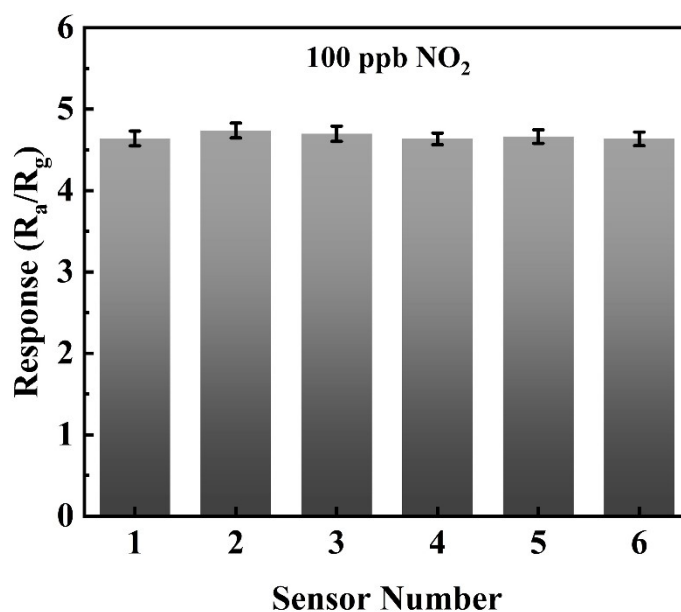

**Fig. S9** Response values and error bars for six independently prepared CuO-2 sensors at 75°C for 100 ppb NO<sub>2</sub>.

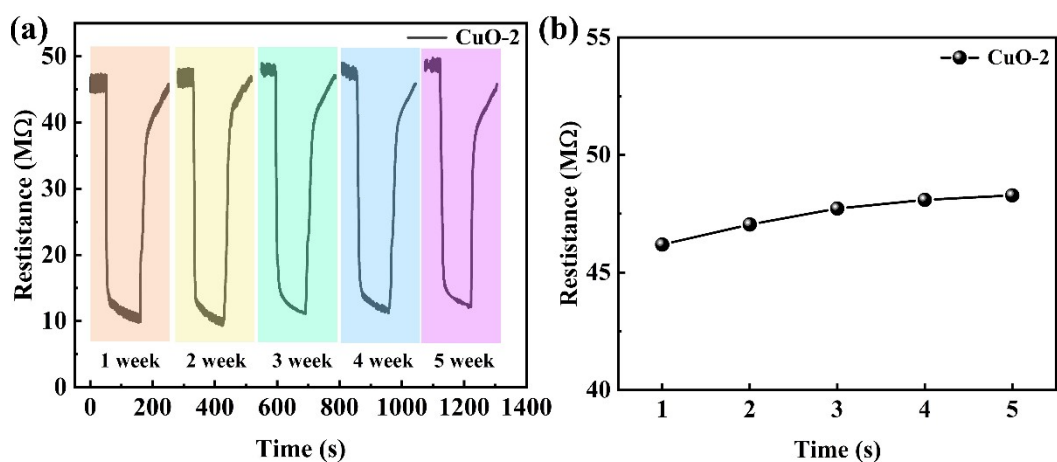

**Fig. S10** (a) Dynamic resistance curve of the CuO-2 sensor at 75°C for 100 ppb NO<sub>2</sub> over five consecutive weeks. (b) Trend of base resistance in CuO-2 sensor at 75°C for 100 ppb NO<sub>2</sub> over five weeks.

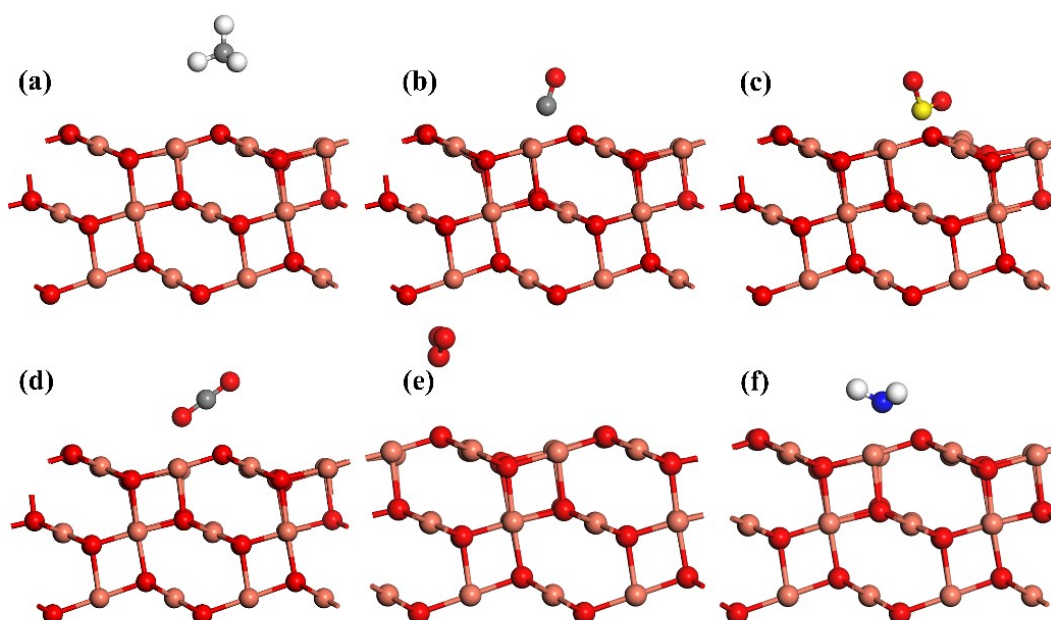

**Fig. S11** Optimized adsorption configuration of (a) CH<sub>4</sub>, (b) CO, (c) SO<sub>2</sub>, (d) CO<sub>2</sub>, (e) O<sub>3</sub>, and (f) NH<sub>3</sub> on CuO surfaces with oxygen vacancies.

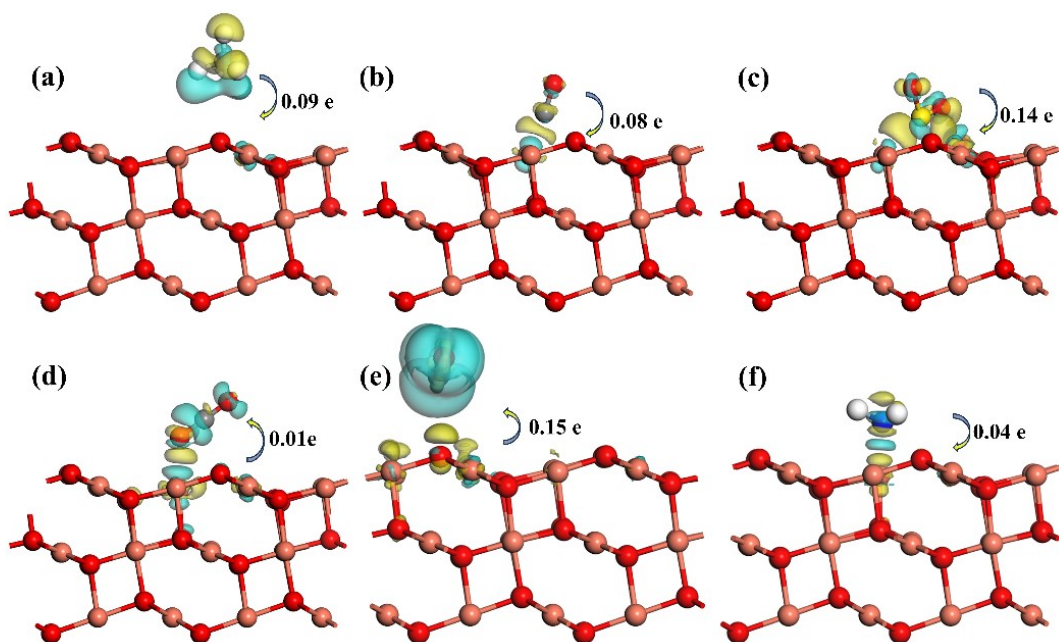

**Fig. S12** The charge density difference plot of (a) CH<sub>4</sub>, (b) CO, (c) SO<sub>2</sub>, (d) CO<sub>2</sub>, (e) O<sub>3</sub>, and (f) NH<sub>3</sub> interaction with the CuO plane with oxygen vacancies, where blue and yellow represent positive and negative changes in charge densities (e/Bohr<sup>3</sup>), respectively. A positive charge change (blue) corresponds to a depletion of Bader charge, while a negative charge change (yellow) indicates an accumulation of Bader charge.

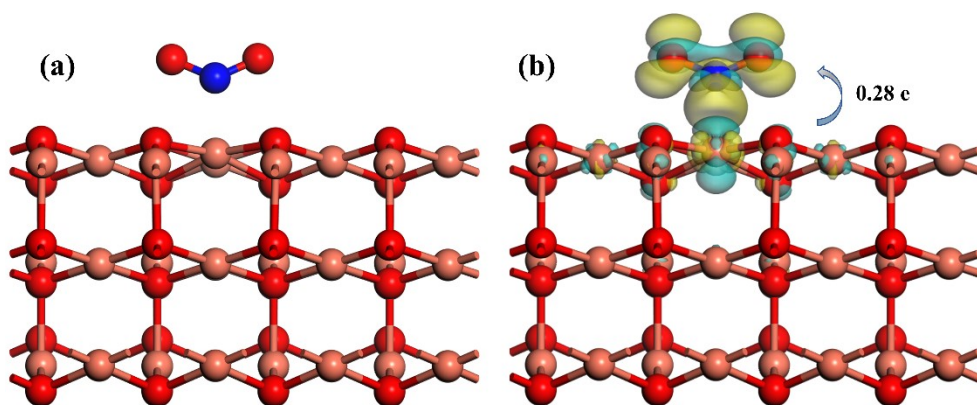

**Fig. S13** (a) Optimized adsorption configuration of NO<sub>2</sub> on the CuO (111) plane. (b) The charge density difference plot of NO<sub>2</sub> interaction with the CuO (111) plane.

## References:

1. R. Xue, L. Yu, M. Gong, C. Zhang, S. Li, S. Yang, X. Xiao, N. Nan, C. Li and X. Fan, *Sensors and Actuators B: Chemical*, 2025, **441**, 138047.
